# Supplementary material for: Process Design for a Production of Sustainable Materials from Post-Production Clay
Source: MDPI journal article supplement (doi:10.3390/ma14040953), 2021-02-18
Supplement: s1 [file s1]

# Process design for a production of sustainable materials from post-production clay

Michał Łach<sup>1</sup>, Reda A. Gado<sup>2</sup>, Joanna Marczyk<sup>1</sup>, Celina Ziejewska<sup>1</sup>, Neslihan Doğan-Sağlamtimur<sup>3</sup>, Janusz Mikuła<sup>1</sup>, Magdalena Szechynska-Hebda<sup>4,5\*</sup> and Marek Hebda<sup>1\*</sup>

<sup>1</sup> Institute of Materials Engineering, Faculty of Material Engineering and Physics, Cracow University of Technology, Warszawska 24, 31-155 Kraków, Poland

<sup>2</sup> Department of Refractories, Ceramic and Building Materials, National Research Center (NRC), 12311 Dokki, Egypt

<sup>3</sup> Department of Environmental Engineering, Nigde Omer Halisdemir University, 51240 Nigde, Turkey

<sup>4</sup> The Franciszek Górski Institute of Plant Physiology Polish Academy of Sciences, Niezapominajek 21, 30-239, Cracow, Poland

<sup>5</sup> The Plant Breeding and Acclimatization Institute - National Research Institute, Radzików, 05-870 Błonie, Poland

\* Corresponding author. e-mail address: mhebda@pk.edu.pl tel.: +48 12628342, e-mail address: m.szechynska@ifr-pan.edu.pl tel.: +48 12 4251833

## Supplementary Materials: Figure S1 and Figure S2

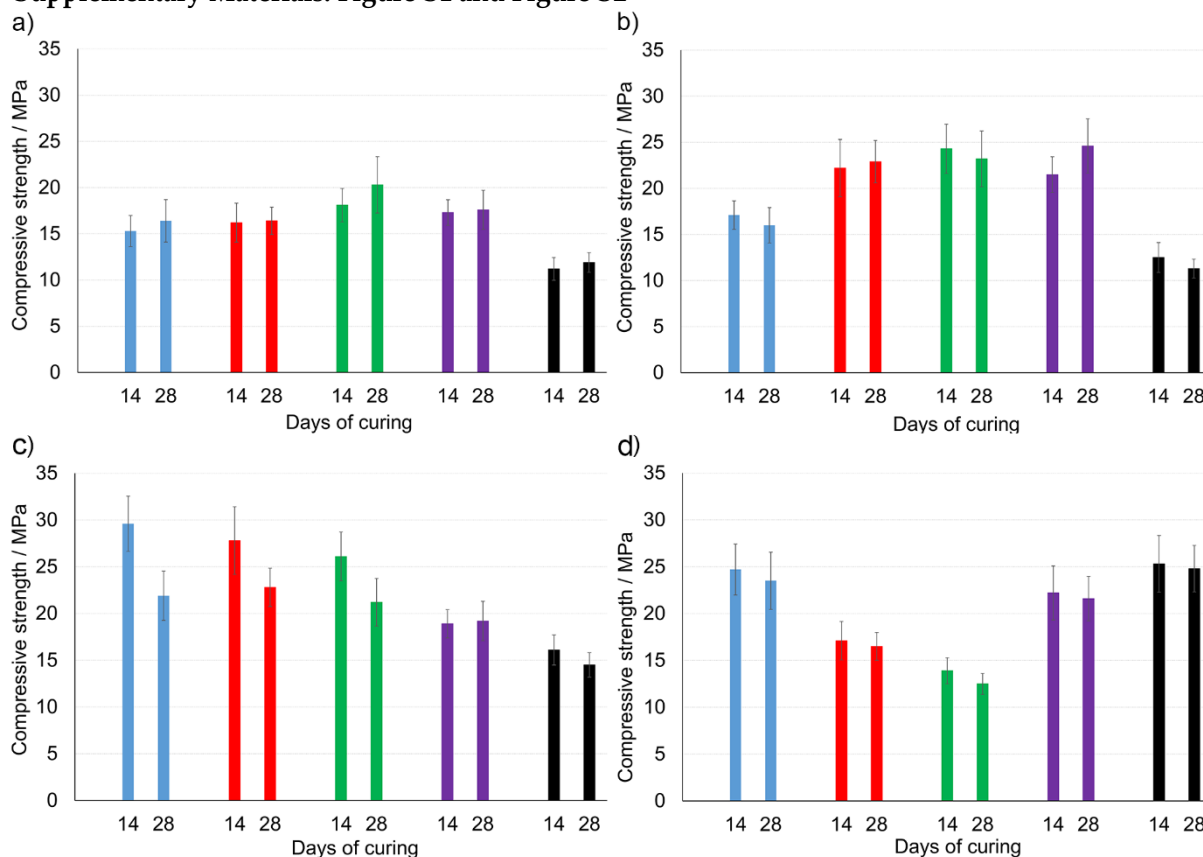

**Figure S1.** Compressive strength of the alkali-activated cement formed from post-production clay mixed with sand; calcined at two different temperatures: (a) 700 °C and (b) 750 °C; or formed from post-production clay mixed with sand and additives: (c) fly ash, (d) metakaolin; calcined at 750 °C; activated by NaOH (blue bars), NaOH:KOH 9:1 (red bars), NaOH:KOH 3:1 (green bars), NaOH:KOH 1:1 (purple bars), and KOH (black bars); cured for 14 and 28 days.

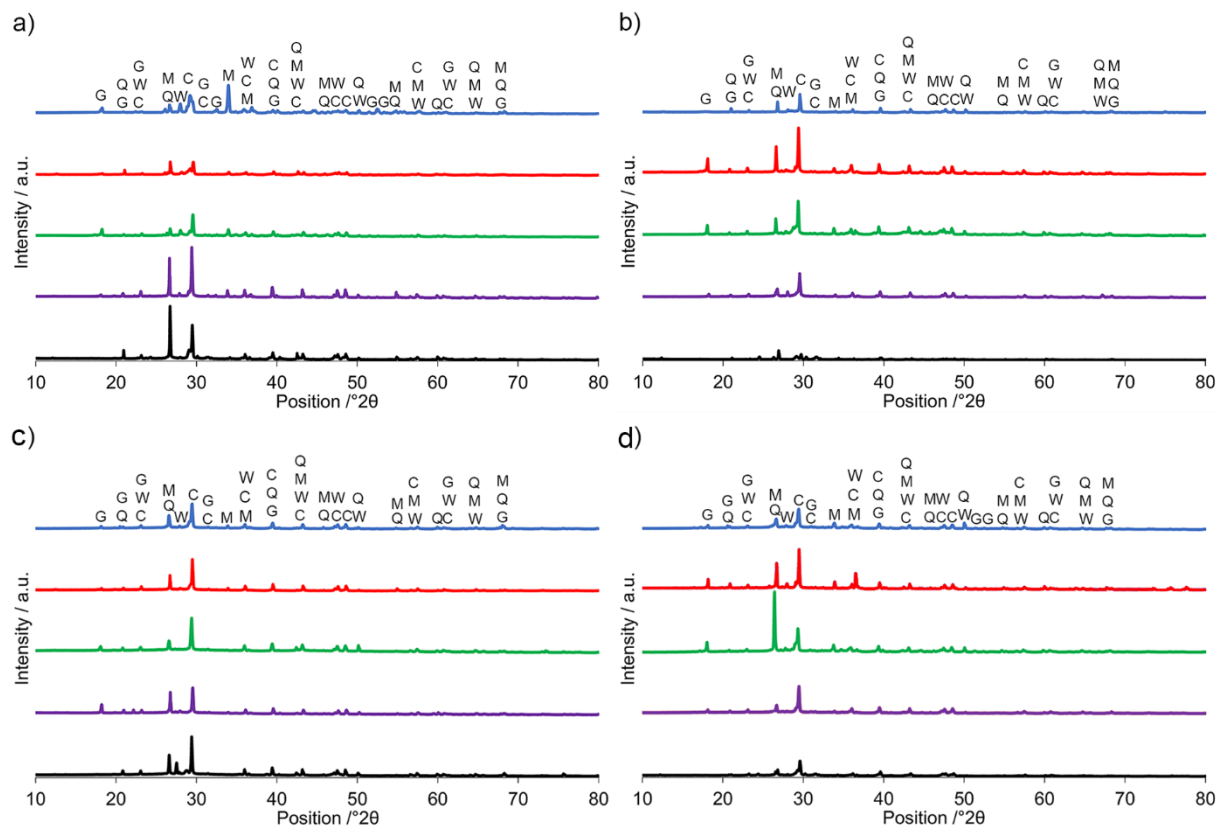

**Figure S2.** X-ray diffraction pattern of the alkali-activated cement formed from post-production clay mixed with sand; calcined at two different temperatures: (a) 700 °C and (b) 750 °C; or formed from post-production clay mixed with sand and additives: (c) fly ash, (d) metakaolin; calcined at 750 °C; activated by NaOH (blue), NaOH:KOH 9:1 (red), NaOH:KOH 3:1 (green), NaOH:KOH 1:1 (purple), and KOH (black); cured for 28 days.
